# Supplementary material for: Gut Microbiota and Metabolome Changes in Three Pulmonary Hypertension Rat Models
Source: MDPI journal article supplement (doi:10.3390/microorganisms11020472), 2023-02-13
Supplement: s1 [file s1]

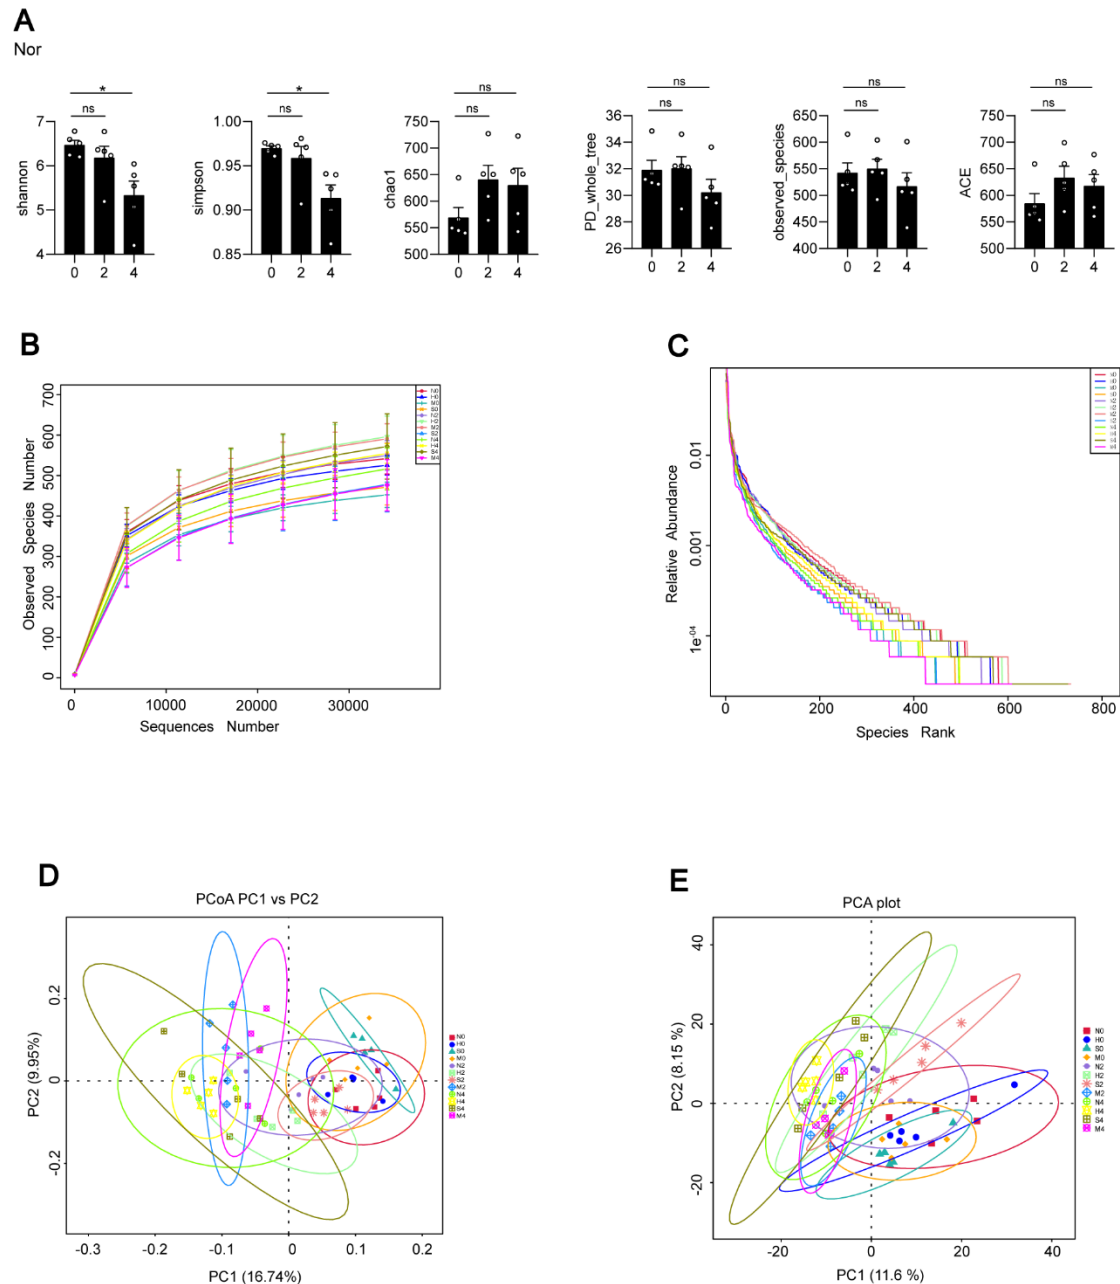

**Supplementary Figure S1.** The intestinal microbiota structure of Nor-, Hyp-, HySu-, and MCT-induced PH rats. Feces were collected from rats at weeks 0, 2, and 4. **(A)** The  $\alpha$  diversity and  $\beta$  diversity of the gut microbiota in normoxic rats as measured by the Shannon, Simpson, Chao, PD whole tree, observed species indices and ACE. Chao1 estimates the number of species, whereas Shannon estimates the effective number of species. The results are presented as the mean  $\pm$  SEM of 5 animals. \* $P < 0.05$ , ns: no significance. one-way ANOVA followed by Student-Newman-Keuls multiple comparison test was used for Shannon, Simpson, and observed species indices. The Kruskal–Wallis test followed by the Dunnett post hoc test were used for Chao, PD whole tree, and ACE. **(B)** Rarefaction curves for the observed species in the gut microbiota from Nor-, Hyp-, HySu-, and MCT-induced rats ( $n=5$ ). **(C)** Rank abundance

curves. **(D, E)** Analysis of  $\beta$  diversity of gut microbiota in rats. Weighted UniFrac principal coordinates analysis (PCoA) **(D)** and principal component analysis (PCA) **(E)** of gut microbiota based on the OTU data of each sample of 12 group. Each point represents a sample. Nor (N): normoxia group; Hyp (H): hypoxia-induced group; HySu (S): hypoxia/Sugen 5416-induced group; MCT (M): MCT-induced group. 0, 2, and 4 represent the week of treatment.

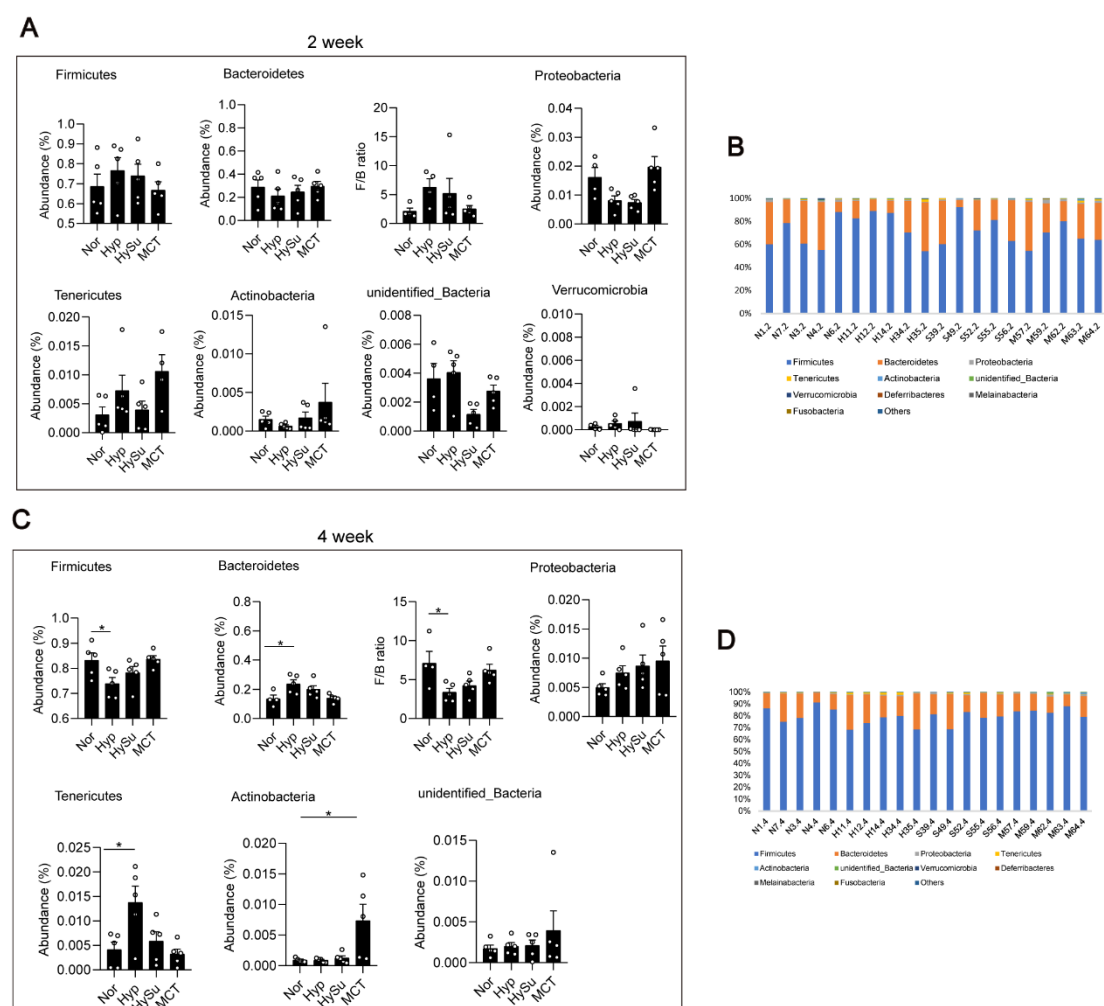

**Supplementary Figure S2.** Fecal microbial composition at the phylum level. **(A-D)** Changes in Firmicutes, Bacteroidetes, Proteobacteria, unidentified bacteria, Melainabacteria and the ratio of Firmicutes/Bacteroidetes ( $n = 4-5$  per group). Data are presented as the mean  $\pm$  SEM. \* $P < 0.05$ , ns: no significance. one-way ANOVA followed by Student-Newman-Keuls multiple comparison test for parametric distributions. The Kruskal–Wallis test followed by the Dunnnett post hoc test were used for non-parametric distributions. N1, N3, N4, N6, and N7 represent the codes of rats in the normoxia group (Nor). H11, H12, H14, H34, and H35 represent the codes of rats in the Hyp-induced group (Hyp). S39, S49, S52, S55, and S56 represent the codes of rats in the HySu-induced group (HySu). M57, M59, M62, M63, and M64 represent the codes of rats in the MCT-induced group (MCT). 0, 2, and 4 represent the week of

treatment.

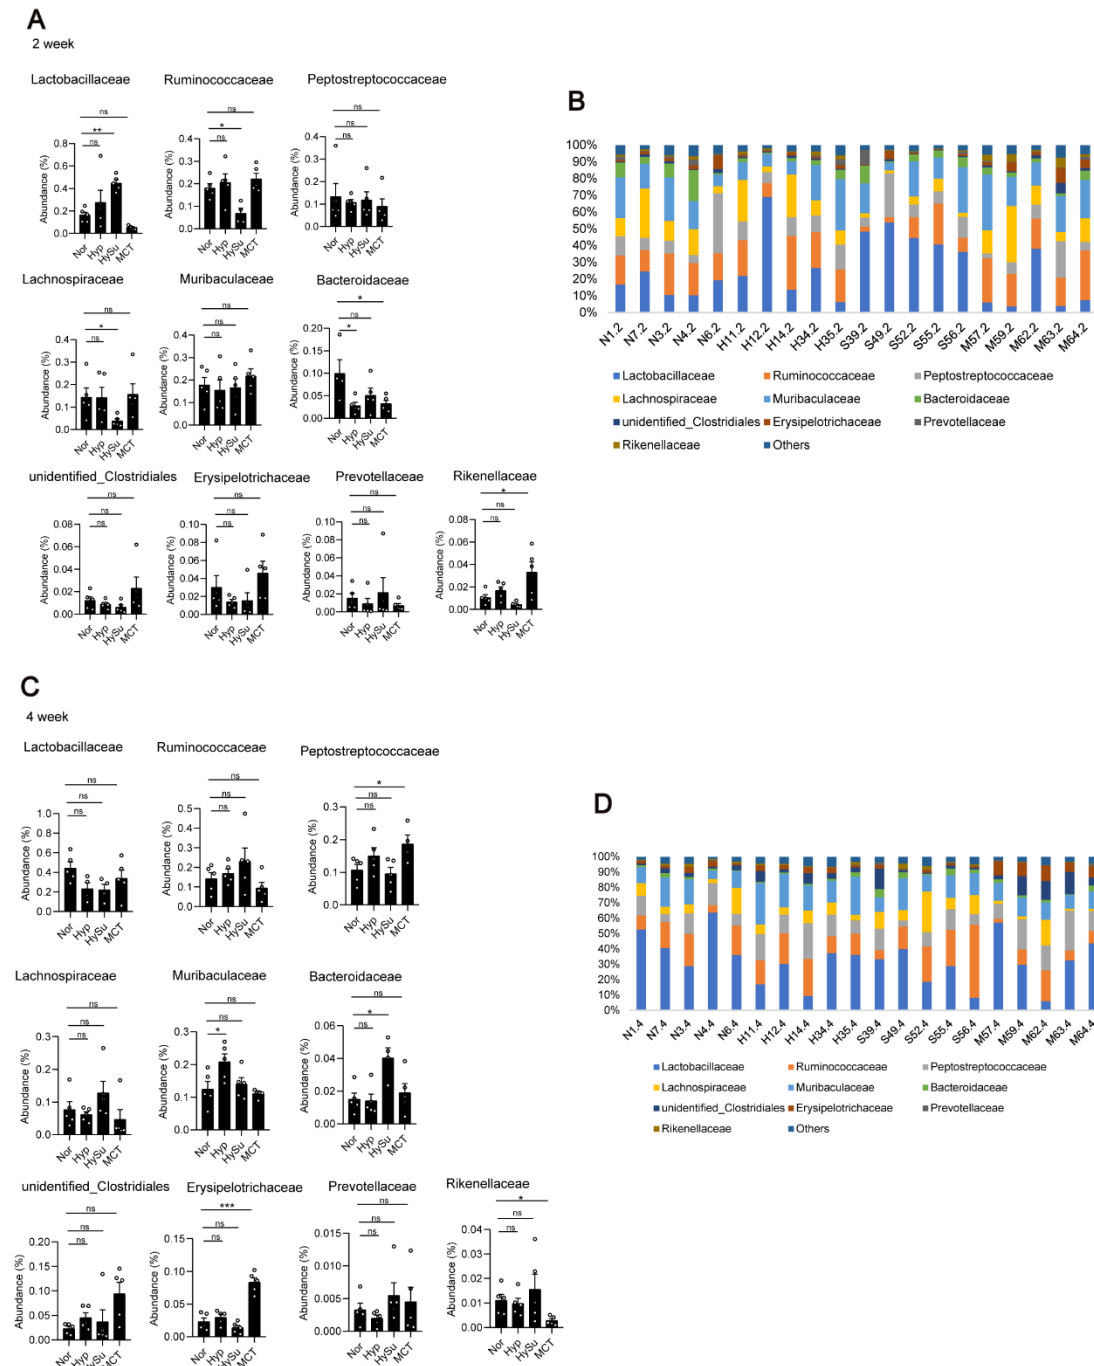

**Supplementary Figure S3.** Fecal microbial composition at the family level. (A-D) The most abundant taxa changes at the family level ( $n = 4-5$  per group). Data are presented as the mean  $\pm$  SEM.  $*P < 0.05$ ,  $**P < 0.01$ ,  $***P < 0.001$ , ns: no significance. one-way ANOVA followed by Student-Newman-Keuls multiple comparison test for parametric

distributions. The Kruskal–Wallis test followed by the Dunnett post hoc test were used for non-parametric distributions. N1, N3, N4, N6, and N7 represent the codes of rats in the normoxia group (Nor). H11, H12, H14, H34, and H35 represent the codes of rats in the Hyp-induced group (Hyp). S39, S49, S52, S55, and S56 represent the codes of rats in the HySu-induced group (HySu). M57, M59, M62, M63, and M64 represent the codes of rats in the MCT-induced group (MCT). 0, 2, and 4 represent the week of treatment.

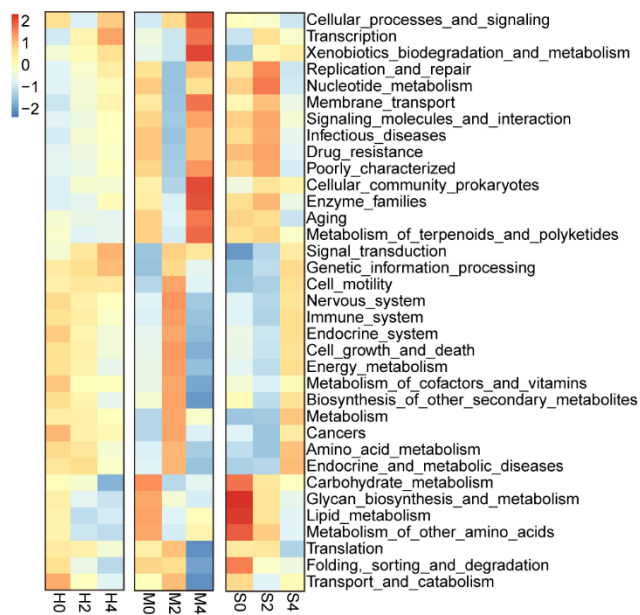

**Supplementary Figure S4.** Kyoto Encyclopedia of Genes and Genomes (KEGG) pathway analysis at level 2. Statistically significant KEGG pathways of the hypoxia-induced, hypoxia/Sugen 5416-induced and MCT-induced groups were determined using STAMP software, and a LefSe (LDA score > 2) of significant KEGG pathways was performed. H: hypoxia-induced group; S: hypoxia/Sugen 5416-induced group; M: MCT-induced group; 0, 2, and 4 represent the week of treatment.

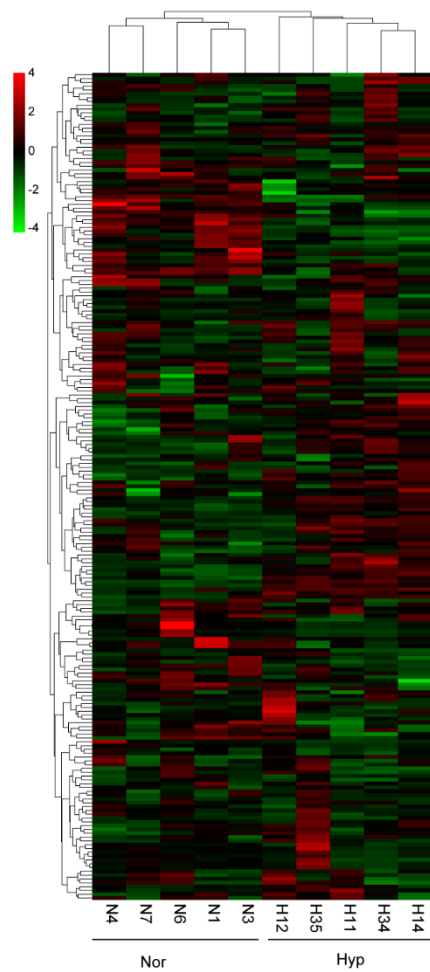

**Supplementary Figure S5.** Heatmap analysis of differential metabolites between the Nor and Hyp groups. N1, N3, N4, N6, and N7 represent the codes of rats in the normoxia group (Nor). H11, H12, H14, H34, and H35 represent the codes of rats in the Hyp-induced group (Hyp).

**Supplementary Table S1.** Number of reads and operational taxonomic units and the good coverage estimation for each sample from the pyrosequencing analysis.

| #Sample_name | Raw_reads<br>(#) | Clean_Reads<br>(#) | Base(nt) | AvgLen(nt) | Q20   | GC%   | Effective% |
|--------------|------------------|--------------------|----------|------------|-------|-------|------------|
| N1.0         | 87698            | 80213              | 32881515 | 409        | 75.54 | 52.29 | 91.47      |
| N7.0         | 84161            | 80177              | 33044666 | 412        | 72.11 | 52.44 | 95.27      |
| N3.0         | 87208            | 80109              | 32599389 | 406        | 75.01 | 52.93 | 91.86      |
| N4.0         | 86751            | 80142              | 32900001 | 410        | 73.98 | 52.4  | 92.38      |
| N6.0         | 83152            | 80116              | 32404145 | 404        | 74.9  | 52.19 | 96.35      |
| H11.0        | 83146            | 80065              | 33423708 | 417        | 71.82 | 51.67 | 96.29      |
| H12.0        | 84440            | 80154              | 32712042 | 408        | 74.39 | 51.74 | 94.92      |
| H14.0        | 85240            | 80124              | 32457535 | 405        | 72.75 | 52.65 | 94         |
| H34.0        | 86528            | 80213              | 32564345 | 405        | 75.06 | 52.44 | 92.7       |
| H35.0        | 88861            | 80110              | 32583688 | 406        | 75.11 | 52.26 | 90.15      |
| M57.0        | 83440            | 80082              | 32961259 | 411        | 72.1  | 52.21 | 95.98      |
| M59.0        | 83578            | 80119              | 33568313 | 418        | 71.89 | 51.66 | 95.86      |
| M62.0        | 84612            | 80025              | 32870260 | 410        | 75.71 | 51.42 | 94.58      |
| M63.0        | 87682            | 80234              | 33532017 | 417        | 71.1  | 51.58 | 91.51      |
| M64.0        | 86017            | 80084              | 33265284 | 415        | 74.06 | 51.3  | 93.1       |
| S39.0        | 69300            | 64471              | 26580812 | 412        | 72.01 | 52.19 | 93.03      |
| S49.0        | 73109            | 67015              | 27813659 | 415        | 71.59 | 51.69 | 91.66      |
| S52.0        | 89049            | 80234              | 33543422 | 418        | 73.67 | 51.41 | 90.1       |
| S55.0        | 86604            | 80175              | 33639065 | 419        | 83.01 | 51.86 | 92.58      |
| S56.0        | 86060            | 80086              | 33478123 | 418        | 83.05 | 52.11 | 93.06      |
| N1.2         | 83784            | 80248              | 33326010 | 415        | 81.89 | 52.68 | 95.78      |
| N7.2         | 87746            | 80175              | 33194636 | 414        | 80.71 | 52.86 | 91.37      |
| N3.2         | 84992            | 80089              | 32953330 | 411        | 82.36 | 52.55 | 94.23      |
| N4.2         | 84905            | 80093              | 33181212 | 414        | 80.51 | 51.96 | 94.33      |
| N6.2         | 86086            | 80055              | 32937516 | 411        | 81.92 | 52.71 | 92.99      |
| H11.2        | 87769            | 80093              | 32881642 | 410        | 81.58 | 52.86 | 91.25      |
| H12.2        | 82763            | 80137              | 33830512 | 422        | 80.78 | 51.52 | 96.83      |
| H14.2        | 83701            | 80192              | 32907873 | 410        | 81.39 | 52.7  | 95.81      |

|       |       |       |          |     |       |       |       |
|-------|-------|-------|----------|-----|-------|-------|-------|
| H34.2 | 88797 | 80122 | 33234715 | 414 | 82.37 | 52.66 | 90.23 |
| H35.2 | 82237 | 80158 | 33047645 | 412 | 80.74 | 52.87 | 97.47 |
| M57.2 | 83266 | 80076 | 33045394 | 412 | 81.34 | 53.16 | 96.17 |
| M59.2 | 83415 | 80202 | 32778739 | 408 | 79.8  | 53.56 | 96.15 |
| M62.2 | 86462 | 80075 | 33307278 | 415 | 82.87 | 52.44 | 92.61 |
| M63.2 | 86303 | 80023 | 33034422 | 412 | 80.62 | 52.94 | 92.72 |
| M64.2 | 82174 | 80032 | 32898895 | 411 | 82.96 | 52.84 | 97.39 |
| S39.2 | 84424 | 80224 | 33892158 | 422 | 81.95 | 51.86 | 95.03 |
| S49.2 | 84691 | 80134 | 33684508 | 420 | 80.9  | 52.2  | 94.62 |
| S52.2 | 84686 | 80170 | 33455203 | 417 | 82.77 | 52.17 | 94.67 |
| S55.2 | 84876 | 80324 | 33349695 | 415 | 82.89 | 52.18 | 94.64 |
| S56.2 | 82581 | 80042 | 33531436 | 418 | 81.6  | 52.71 | 96.93 |
| N1.4  | 83254 | 80134 | 33618999 | 419 | 80.66 | 52.53 | 96.25 |
| N7.4  | 86914 | 80096 | 33551768 | 418 | 81.18 | 52.45 | 92.16 |
| N3.4  | 84566 | 80053 | 33090205 | 413 | 81.81 | 52.16 | 94.66 |
| N4.4  | 84404 | 80096 | 33673849 | 420 | 82.05 | 52.12 | 94.9  |
| N6.4  | 82364 | 80024 | 33274486 | 415 | 81.05 | 52.39 | 97.16 |
| H11.4 | 85204 | 80119 | 33191783 | 414 | 81.94 | 52.96 | 94.03 |
| H12.4 | 86571 | 80133 | 33266167 | 415 | 82.43 | 52.41 | 92.56 |
| H14.4 | 87170 | 80150 | 32892940 | 410 | 82.03 | 52.86 | 91.95 |
| H34.4 | 88717 | 80060 | 33277595 | 415 | 82.04 | 52.54 | 90.24 |
| H35.4 | 81706 | 80043 | 33531468 | 418 | 80.65 | 52.4  | 97.96 |
| S39.4 | 87926 | 80308 | 33436633 | 416 | 81.91 | 52.57 | 91.34 |
| S49.4 | 85230 | 80102 | 33536221 | 418 | 82.36 | 52.29 | 93.98 |
| S52.4 | 87921 | 80190 | 32785883 | 408 | 82    | 53.36 | 91.21 |
| S55.4 | 86523 | 80030 | 33041848 | 412 | 82.18 | 52.47 | 92.5  |
| S56.4 | 88141 | 80209 | 32732908 | 408 | 81.17 | 53.25 | 91    |
| M57.4 | 74428 | 72483 | 30575737 | 421 | 86.89 | 52.09 | 97.39 |
| M59.4 | 85191 | 80048 | 33372336 | 416 | 83.3  | 52.6  | 93.96 |
| M62.4 | 84158 | 80070 | 32810591 | 409 | 85.46 | 52.96 | 95.14 |
| M63.4 | 85678 | 80095 | 33411923 | 417 | 82.41 | 52.46 | 93.48 |
| M64.4 | 83754 | 80273 | 33661411 | 419 | 84.4  | 51.89 | 95.84 |

---
